# Supplementary material for: Effect of fluorine substitution on the photovoltaic performance of poly(thiophene-quinoxaline) copolymers
Source: Royal Society of Chemistry journal article supplement (doi:10.1039/c5py01193k), 2015-01-01
Supplement: c5py01193k1.pdf [file c5py01193k1.pdf]

# Effect of Fluorine Substitution on the Photovoltaic Performance of Poly(thiophene-quinoxaline) Copolymers

Zi Qiao <sup>1,2</sup>, Meng Wang <sup>1,2</sup>, Mingzhi Zhao <sup>1,2</sup>, ZhiGuo Zhang<sup>3</sup>, Yongfang

Li<sup>3\*</sup>, Xiaoyu Li <sup>1,2\*</sup>, Haiqiao Wang <sup>1,2\*</sup>

1. State Key Laboratory of Organic-Inorganic Composite, Beijing University of Chemical Technology, Beijing 100029, China

2. Key Laboratory of Carbon Fiber and Functional Polymers, Ministry of Education, Beijing University of Chemical Technology, Beijing 100029, China

3. Beijing National Laboratory for Molecular Sciences, Institute of Chemistry, Chinese Academy of Sciences, Beijing 100190, China

## Contents:

|                                             |           |
|---------------------------------------------|-----------|
| 1. Detailed photovoltaic data.              | Table S1  |
| 2. DSC thermograms of the polymers          | Figure S1 |
| 3. TGA plots of the polymers                | Figure S2 |
| 4. Energy level diagrams                    | Figure S3 |
| 5. UV/Vis absorption spectra of blend films | Figure S4 |
| 6. Hole mobility of the polymers            | Figure S5 |

**Table S1.** The detailed photovoltaic data of the optimization process of the PSCs

| polymer | Ratio <sup>a</sup> | treatment        | Voc(V) | Jsc(mA cm <sup>-2</sup> ) | FF(%) | PCE(%) |
|---------|--------------------|------------------|--------|---------------------------|-------|--------|
| PT-QX   | 1 : 1              | none             | 0.61   | 5.81                      | 33.82 | 1.20   |
|         | 1 : 2              | none             | 0.59   | 5.82                      | 34.49 | 1.19   |
|         | 1 : 3              | none             | 0.58   | 4.68                      | 38.62 | 1.05   |
|         | 1 : 1.4            | none             | 0.63   | 6.76                      | 34.58 | 1.47   |
|         | 1 : 1.4            | annealing        | 0.63   | 6.76                      | 34.58 | 1.47   |
|         | 1 : 1.4            | CH3OH            | 0.63   | 7.17                      | 43.17 | 1.95   |
|         | 1 : 1.4            | Zracac           | 0.64   | 7.41                      | 51.09 | 2.44   |
|         | 1 : 1.4            | Zracac、<br>3%DIO | 0.60   | 9.10                      | 51.79 | 2.82   |
| PT-FQX  | 1 : 1              | none             | 0.62   | 5.42                      | 49.27 | 1.67   |
|         | 1 : 2              | none             | 0.71   | 5.62                      | 56.27 | 2.25   |
|         | 1 : 3              | none             | 0.67   | 5.72                      | 53.48 | 2.03   |
|         | 1 : 1.3            | none             | 0.72   | 7.53                      | 50.97 | 2.76   |
|         | 1 : 1.3            | annealing        | 0.70   | 7.34                      | 53.53 | 2.77   |
|         | 1 : 1.3            | CH3OH            | 0.73   | 8.60                      | 50.21 | 3.16   |
|         | 1 : 1.3            | Zracac           | 0.73   | 8.27                      | 54.88 | 3.31   |
|         | 1 : 1.3            | Zracac、<br>3%DIO | 0.68   | 11.05                     | 54.92 | 4.14   |
| PT-DFQX | 1 : 1              | none             | 0.70   | 6.87                      | 51.21 | 2.46   |
|         | 1 : 2              | none             | 0.72   | 6.81                      | 48.69 | 2.40   |

|  |         |                  |      |       |       |      |
|--|---------|------------------|------|-------|-------|------|
|  | 1 : 3   | none             | 0.70 | 6.16  | 51.40 | 2.22 |
|  | 1 : 1.2 | none             | 0.81 | 9.20  | 53.29 | 3.96 |
|  | 1 : 1.2 | annealing        | 0.77 | 8.77  | 58.45 | 3.96 |
|  | 1 : 1.2 | CH3OH            | 0.80 | 10.49 | 53.17 | 4.44 |
|  | 1 : 1.2 | Zracac           | 0.83 | 10.80 | 57.00 | 5.09 |
|  | 1 : 1.2 | Zracac、<br>1%DIO | 0.77 | 12.62 | 53.11 | 5.19 |
|  | 1 : 1.2 | Zracac、<br>3%DIO | 0.76 | 13.16 | 51.90 | 5.17 |

[a] Polymer/PC<sub>71</sub>BM weight ratio.

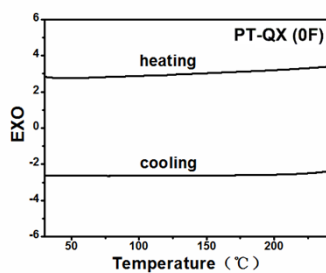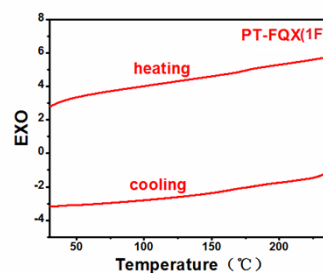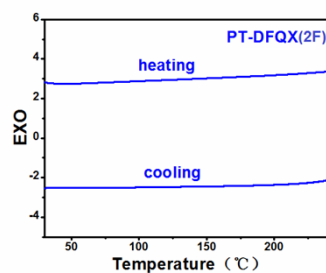

**Figure S1.** The differential scanning calorimetry (DSC) thermograms of the polymers under the protection of nitrogen (heating and cooling rate: 10 °C / min)

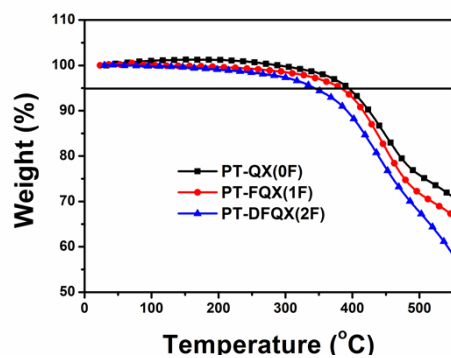

**Figure S2.** TGA plots of the polymers with a heating rate of  $10\text{ }^{\circ}\text{C min}^{-1}$  under a  $\text{N}_2$  atmosphere.

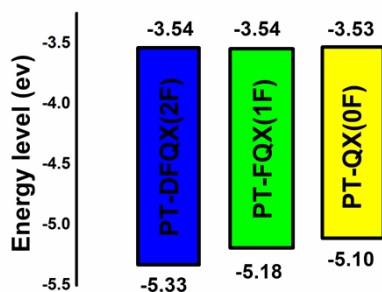

**Figure S3.** Energy level diagrams for the PT-QX (0F), PT-FQX (1F) and PT-DFQX (2F) based polymers.

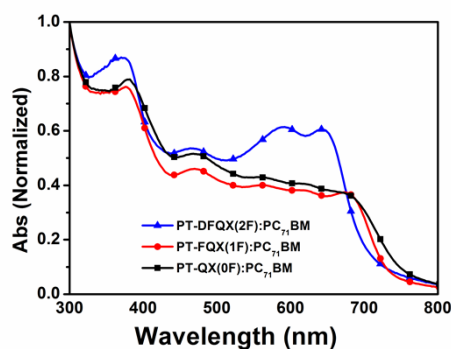

**Figure S4.** UV/Vis absorption spectra of blend films of polymer/PC<sub>71</sub>BM prepared under the optimal conditions.

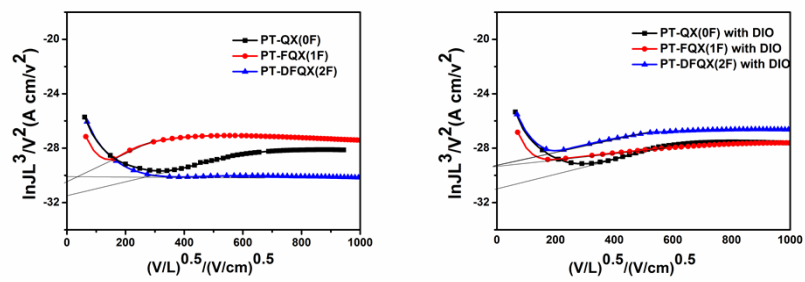

**Figure S5.** Plots of  $\ln(JL^3/V^2)$  versus  $(V/L)^{0.5}$  for the measurement of the hole mobility in the devices based on polymer/PC<sub>71</sub>BM by the SCLC method
